# Supplementary material for: Selective Inhibition of Genomic and Non-Genomic Effects of Thyroid Hormone Regulates Muscle Cell Differentiation and Metabolic Behavior
Source: MDPI journal article supplement (doi:10.3390/ijms22137175), 2021-07-02
Supplement: s1 [file s1]

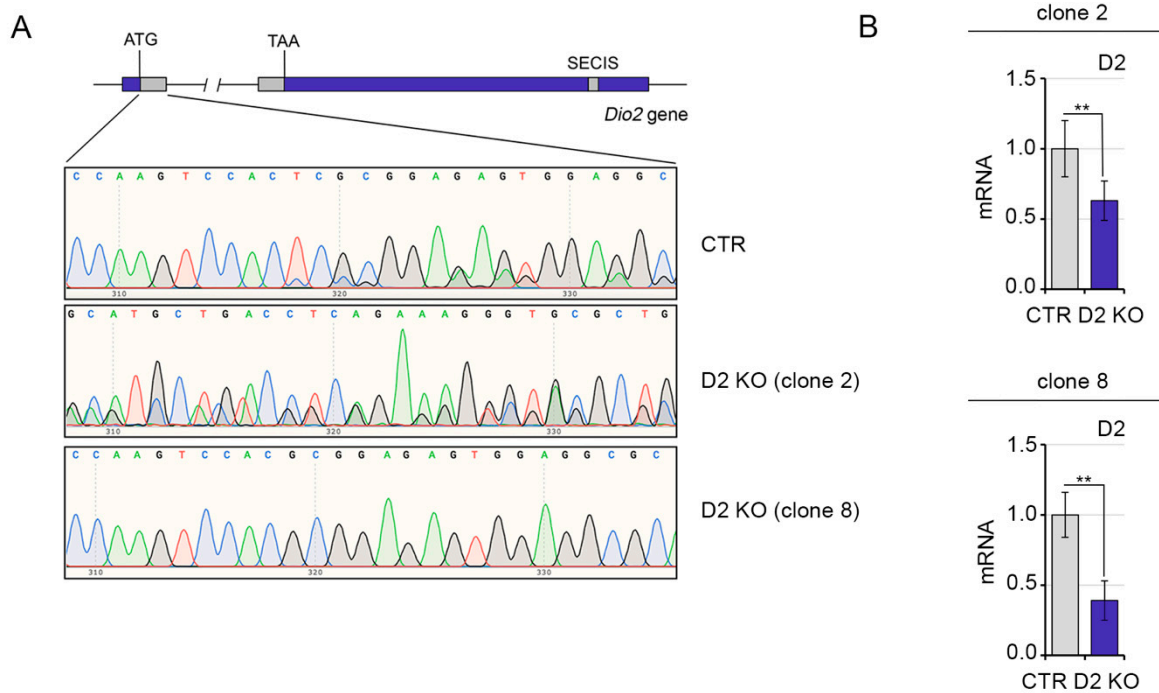

Figure S1

**Figure S1.** Mutagenesis of *Dio2* gene in C2C12 cells. **(A)** Schematic representation of *Dio2* locus. Mutagenesis of *Dio2* locus was assessed by genomic DNA sequencing of exon 1. Electropherogram of two different D2 KO clones (clone 2 and clone 8). **(B)** D2 expression was evaluated by Real-Time PCR in D2 KO (clone 2 and clone 8) and CTR cells. \*\* $p < 0.01$ .

A

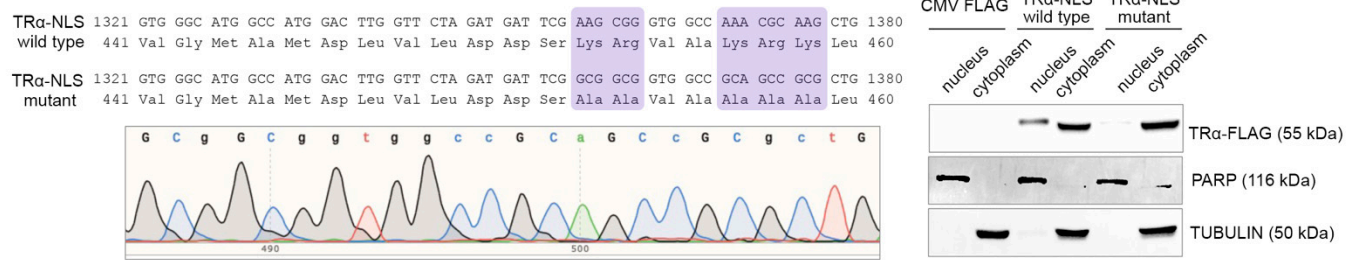

B

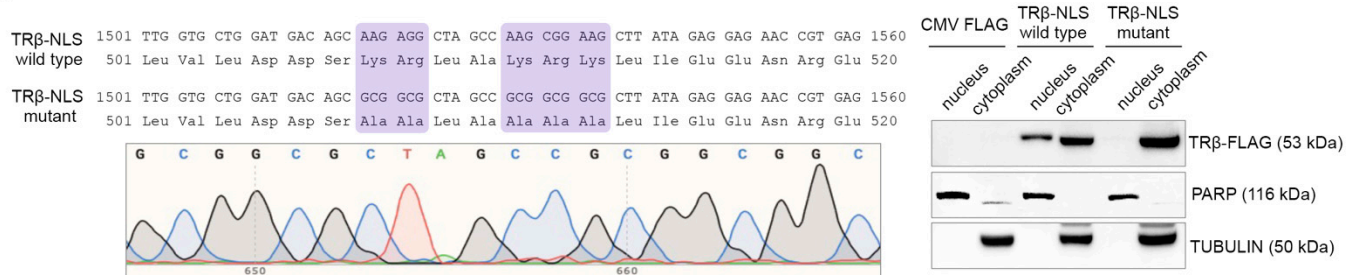

C

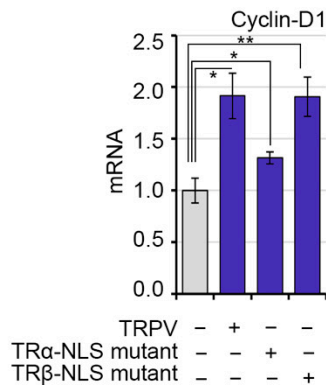

D

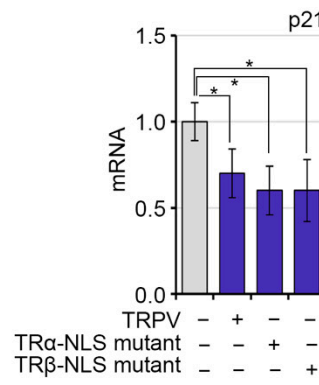

E

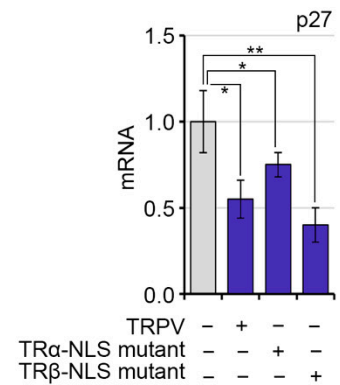

Figure S2

**Figure S2.** Block of nuclear translocation of TRs enhances cell proliferation. (A) Comparison of FLAG-TRα-D wt and FLAG-TRα-D mut sequences. The expression vector CMV FLAG, FLAG-TRα-D wt and FLAG-TRα-D mut plasmids were transfected into C2C12 cells as described in Materials and Methods. Nuclear and cytoplasmic localization of TRα-FLAG was evaluated by Western Blot analysis of nuclear and cytoplasmic fraction of cell lysate. PARP expression was measured as nuclear loading control, while Tubulin expression was measured as cytoplasmic loading control. (B) Comparison of schematic FLAG-TRβ-D wt and FLAG-TRβ-D mut sequences.

The expression vector CMV FLAG, the FLAG-TR $\beta$ -D wt and FLAG-TR $\beta$ -D mut plasmids were transfected into C2C12 cells as described in Materials and Methods. Nuclear and cytoplasmic localization of TR $\beta$ -FLAG was evaluated by Western Blot analysis of nuclear and cytoplasmic fraction of cell lysate. PARP expression was measured as nuclear loading control, while Tubulin expression was measured as cytoplasmic loading control. (C-E) Cyclin-D1, p21 and p27 expression was evaluated by Real-Time PCR in C2C12 cells transiently transfected with a TRPV, FLAG-TR $\alpha$  D mut and FLAG-TR $\beta$ -D mut expressing vector or the CMV FLAG plasmid (control). Data represent the mean of three independent experiments performed in duplicate. \* $p < 0.05$ , \*\* $p < 0.01$ .

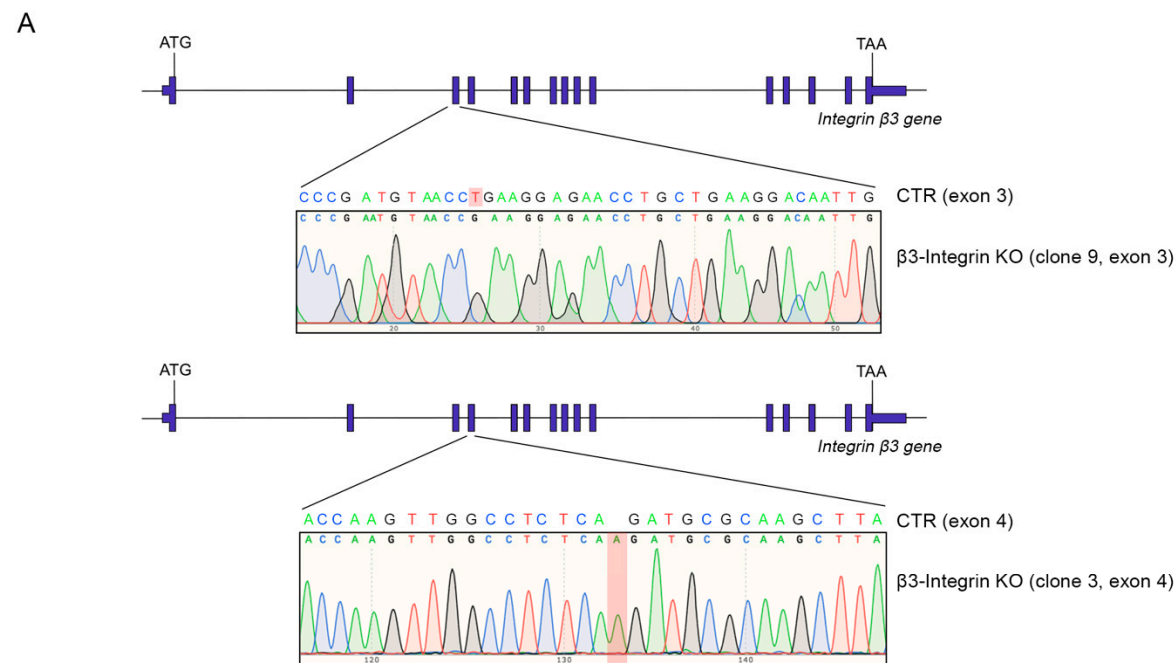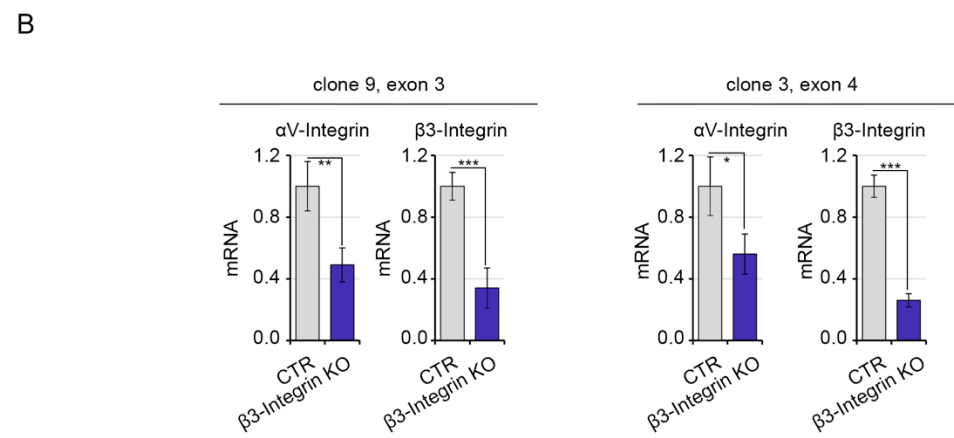

Figure S3

**Figure S3.** Mutagenesis of  $\beta 3$ -Integrin (ITG $\beta 3$ ) gene in C2C12 cells. **(A)** Schematic representation of  $\beta 3$ -Integrin (ITG $\beta 3$ ) locus. Mutagenesis of  $\beta 3$ -Integrin (ITG $\beta 3$ ) locus was assessed by genomic DNA sequencing of exon 3 (clone 9) and exon 4 (clone 3). Electropherogram of two different  $\beta 3$ -Integrin KO clones (clone 9, exon 3 and clone 3, exon 4). **(B)**  $\alpha V$ -Integrin and  $\beta 3$ -Integrin expression was evaluated by Real-Time PCR in  $\beta 3$ -Integrin KO (clone 9, exon 3 and clone 3, exon 4) and CTR cells.

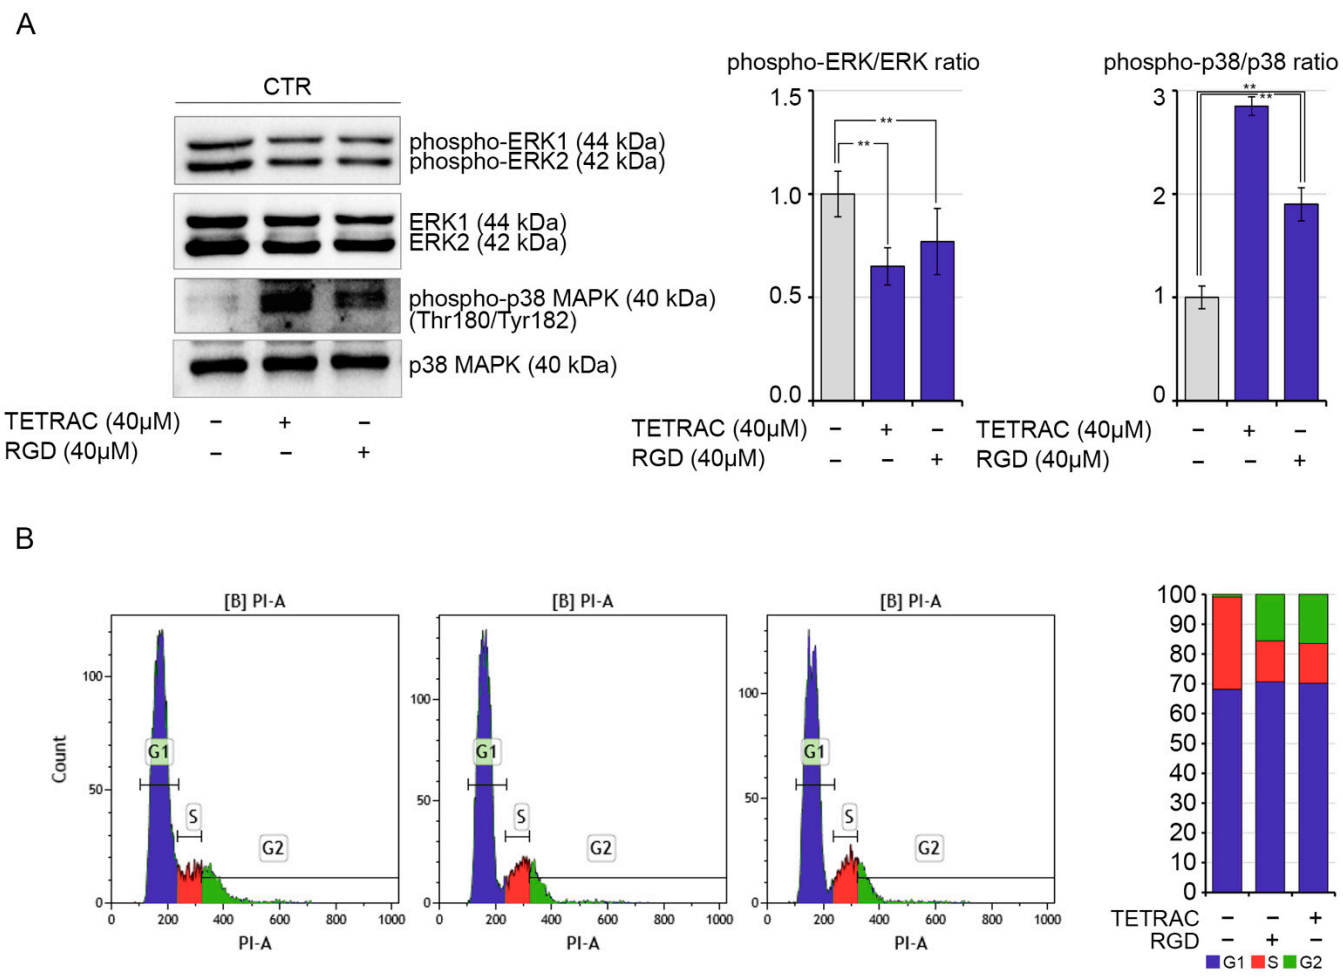

Figure S4

**Figure S4.** Drug-mediated reduction of Integrin signaling reduces cell proliferation **(A)** Western Blot analysis of phospho-ERK 1/2 and phospho-p38 MAPK in CTR cells treated with 40.0  $\mu$ M TETRAC or 40.0  $\mu$ M RGD. ERK 1/2 and p38 MAPK expression was measured as a loading



control. Quantification of the protein levels of phospho-ERK 1/2 versus ERK 1/2 and phospho-p38 MAPK versus p38 MAPK levels are represented by histograms. Data represent the mean of three independent experiments. **(B)** Cell cycle distribution was measured in CTR cells at 6 hours after treatment with 40.0  $\mu$ M TETRAC or 40.0  $\mu$ M RGD. Cells were analyzed with flow cytometry after propidium iodide staining (n=3).

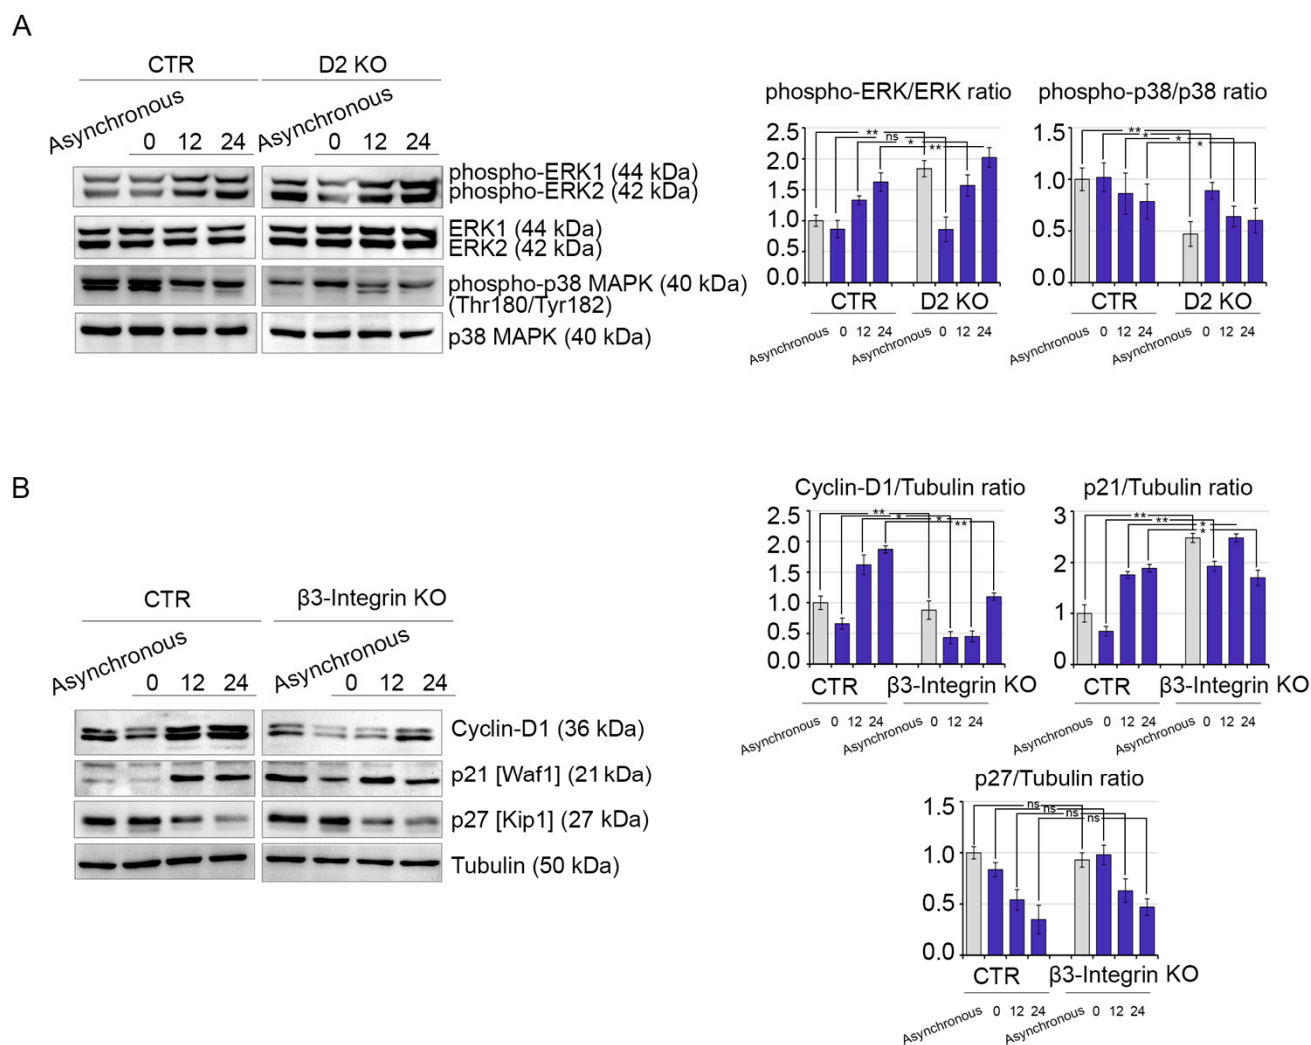

Figure S5

**Figure S5.** Impact of D2 depletion on ERK 1/2 and p38 MAPK signaling and the influence of β3-Integrin knock-out on Cyclin-D1, p21 and p27 signaling. **(A)** Western Blot analysis of phospho-ERK 1/2 and phospho-p38 MAPK in asynchronized and synchronized D2 KO and CTR cells after cell cycle re-initiation at 0, 6, 12 and 24 hours after release from serum starvation. ERK 1/2 and p38

MAPK expression was measured as a loading control. Quantification of the protein levels of phospho-ERK 1/2 versus ERK 1/2 and phospho-p38 MAPK versus p38 MAPK levels are represented by histograms. Data represent the mean of three independent experiments. **(B)** Western Blot analysis of Cyclin-D1, p21 and p27 in asynchronized and synchronized  $\beta$ 3-Integrin KO and CTR cells after cell cycle re-initiation at 0, 6, 12 and 24 hours after release from serum starvation. Tubulin expression was measured as a loading control. Quantification of the protein levels of Cyclin-D1, p21 and p27 versus Tubulin levels is represented by histograms. Data represent the mean of three independent experiments. \* $p < 0.05$ , \*\* $p < 0.01$ .

**Table 1: List of antibodies**

| <b>Antibodies used for Western Blot and Immunofluorescence analysis</b> |                              |                   |                 |
|-------------------------------------------------------------------------|------------------------------|-------------------|-----------------|
| <b>Antibody</b>                                                         | <b>Source</b>                | <b>Identifier</b> | <b>Dilution</b> |
| $\alpha$ -Tubulin                                                       | Sigma Aldrich                | T8203             | 1:5000 WB       |
| $\alpha$ -FLAG M2                                                       | Sigma Aldrich                | F3165             | 1:1000 WB       |
| Cyclin-D1 (HD11)                                                        | Santa Cruz                   | sc-246            | 1:1000 WB       |
| Myosin heavy chain (MHC)                                                | Hybridoma Bank               | MF20              | 1:50 IF         |
| MyoD (C-20)                                                             | Santa Cruz                   | sc-304            | 1:1000 WB       |
| Myogenin (M-225)                                                        | Santa Cruz                   | sc-576            | 1:1000 WB       |
| ERK1/2 (K-23)                                                           | Santa Cruz                   | sc-94             | 1:1000 WB       |
| phospho-p44/42 MAPK (Erk1/2)<br>(Thr202/Tyr204)                         | Cell Signaling<br>Technology | #4370             | 1:5000 WB       |
| PARP                                                                    | Cell Signaling<br>Technology | #9542S            | 1:1000 WB       |
| p38 MAPK                                                                | Cell Signaling<br>Technology | #9211             | 1:1000 WB       |
| phospho-p38 MAPK (Thr180/Tyr182)                                        | Cell Signaling<br>Technology | #9211             | 1:1000 WB       |
| p21 (C-19)                                                              | Santa Cruz                   | sc-397            | 1:1000 WB       |
| p27 Kip1                                                                | BD Biosciences               | 610242            | 1:1000 WB       |

**Table 2: List of oligonucleotides**

| <b>Oligonucleotides used for Real-Time PCR</b> |                                                |                          |
|------------------------------------------------|------------------------------------------------|--------------------------|
| <b>Gene Symbol</b>                             | <b>Oligos</b>                                  | <b>Sequence</b>          |
| <i>Ccnd1</i>                                   | mCyclin-D1_F                                   | GCTCCTGTGCTGCGAAGTGGA    |
|                                                | mCyclin-D1_R                                   | TCATGGCCAGCGGGAAGACCT    |
| <i>Cdkn1a</i>                                  | mp21_F                                         | ACAAGAGGCCCCAGTACTTCC    |
|                                                | mp21_R                                         | GGGCACTTCAGGGTTTTCTC     |
| <i>Cdkn1b</i>                                  | mp27_F                                         | GCGGTGCCTTTAATTGGGTC     |
|                                                | mp27_R                                         | GTTGGCCCTTTTGTGTTTGCG    |
| <i>Dio2</i>                                    | mDio2_F                                        | CTTCCTCCTAGATGCCTACAAAC  |
|                                                | mDio2_R                                        | GGCATAATTGTTACCTGATTGAGG |
| <i>Gclc</i>                                    | mGCLC_F                                        | CCTGGAGCCTCTGAAGAACA     |
|                                                | mGCLC_R                                        | AGACTCGTTGGCATCATCCA     |
| <i>Gpx1</i>                                    | mGPX_F                                         | CTCGGTTTCCCGTGCAATCAG    |
|                                                | mGPX_R                                         | GTGCAGCCAGTAATCACCAAG    |
| <i>Hmox1</i>                                   | mHO1_F                                         | TTCAGAAGGGTCAGGTGTCC     |
|                                                | mHO1_R                                         | CAGTGAGGCCCATACCAGAA     |
| <i>ItgaV</i>                                   | maV-Integrin_F                                 | GATTCGCCGTGGACTTCTTC     |
|                                                | maV-Integrin_R                                 | ATCAAACCTCAATGGGCTGGC    |
| <i>Itgb3</i>                                   | mb3-Integrin_F                                 | GATTACCGACCCTCTCAGCA     |
|                                                | mb3-Integrin_R                                 | GTCCCCACAGTTACATTGCC     |
| <i>Myh7</i>                                    | mMHC-I_F                                       | CGCTCCACGCACCCTCACTT     |
|                                                | mMHC-I_R                                       | GTCCATCACCCCTGGAGAC      |
| <i>Myh4</i>                                    | mMHC-IIb_F                                     | GCTAGGGTGAGGGAGCTTGAA    |
|                                                | mMHC-IIb_R                                     | AGACCCTTGACGGCTTCGA      |
| <i>Myod1</i>                                   | mMyod_F                                        | GACCTGCGCTTTTTTGAGGACC   |
|                                                | mMyoD_R                                        | CAGGCCACAGCAAGCAGCGAC    |
| <i>Myog</i>                                    | mMyogenin_F                                    | TTGCTCAGCTCCCTCAACCAGGA  |
|                                                | mMyogenin_R                                    | TGCAGATTGTGGGCGTCTGTAGG  |
| <i>Nfe2l2</i>                                  | mNFE2L2_F                                      | TGCCCACATTCCCAAACAAG     |
|                                                | mNFE2L2_R                                      | CTGCCAAACTTGCTCCATGT     |
| <i>Ppia</i>                                    | mCyA_F                                         | CGCCACTGTCGCTTTTCG       |
|                                                | mCyA_R                                         | AACTTTGTCTGCAAACAGCTC    |
| <i>Sod2</i>                                    | mSOD2_F                                        | ATCAGGACCCATTGCAAGGA     |
|                                                | mSOD2_R                                        | AGGTTTCACTTCTTGCAAGCT    |
| <b>Oligonucleotides used for mutagenesis</b>   |                                                |                          |
| mTR $\alpha$ -MUT_F                            | CTAGATGATTTCGGCGGCGGTGGCCGCAGCCGCGCTGATTGAGCAG |                          |
| mTR $\alpha$ -MUT_R                            | CTGCTCAATCAGCGCGGCTGCGGCCACCGCCGCCGAATCATCTAG  |                          |
| mTR $\beta$ -MUT_F                             | CTGGATGACAGCGCGGCGCTAGCCGCGGCGGCGCTTATAGAGG    |                          |
| mTR $\beta$ -MUT_R                             | CCTCTATAAGCGCCGCGGCTAGCGCCGCGCTGTCATCCAG       |                          |

Figure 1E

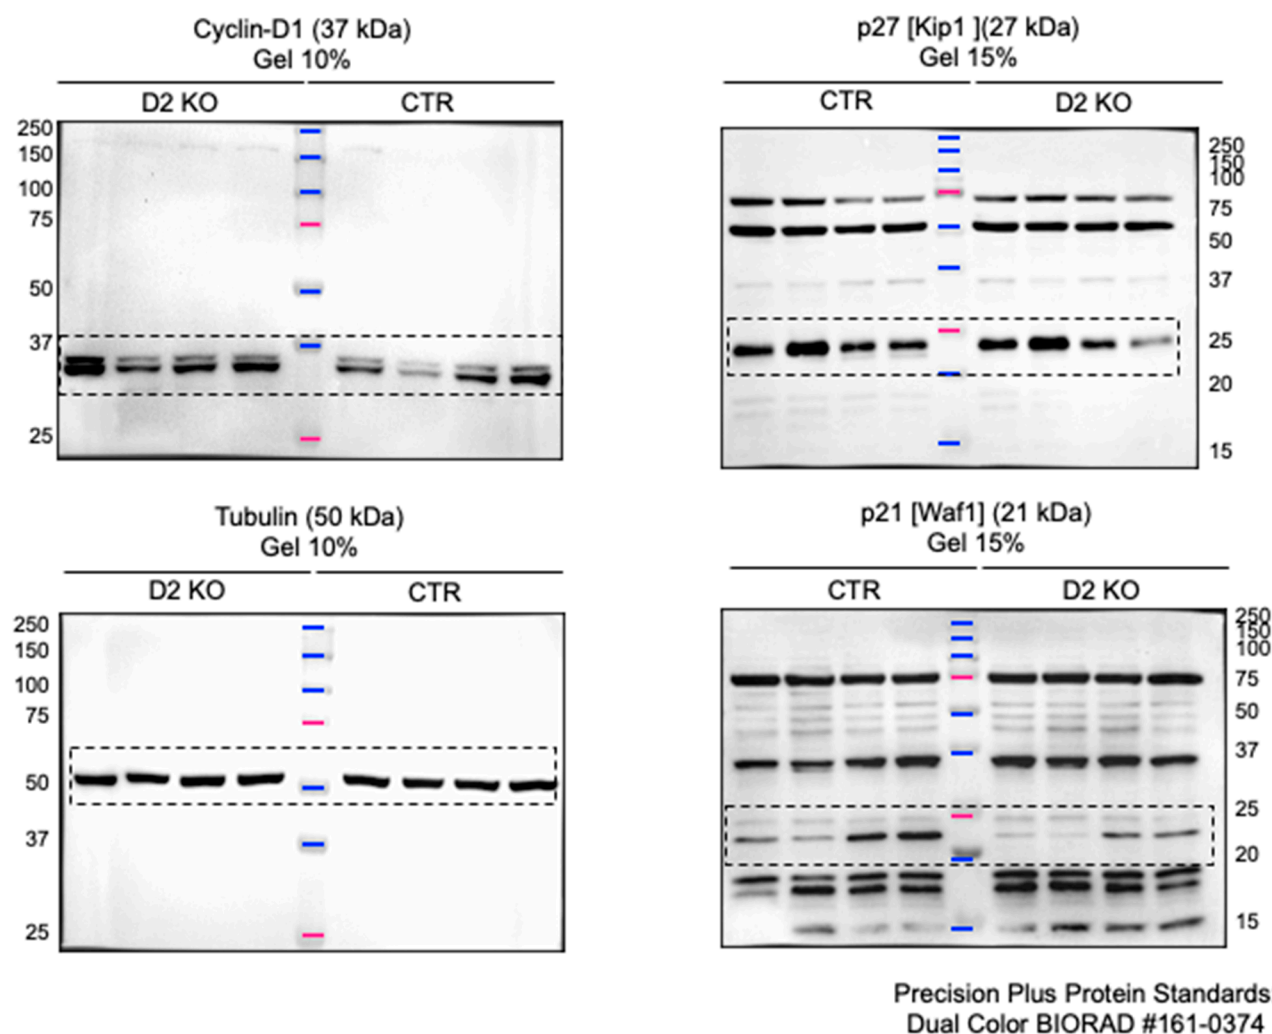

Figure 2D

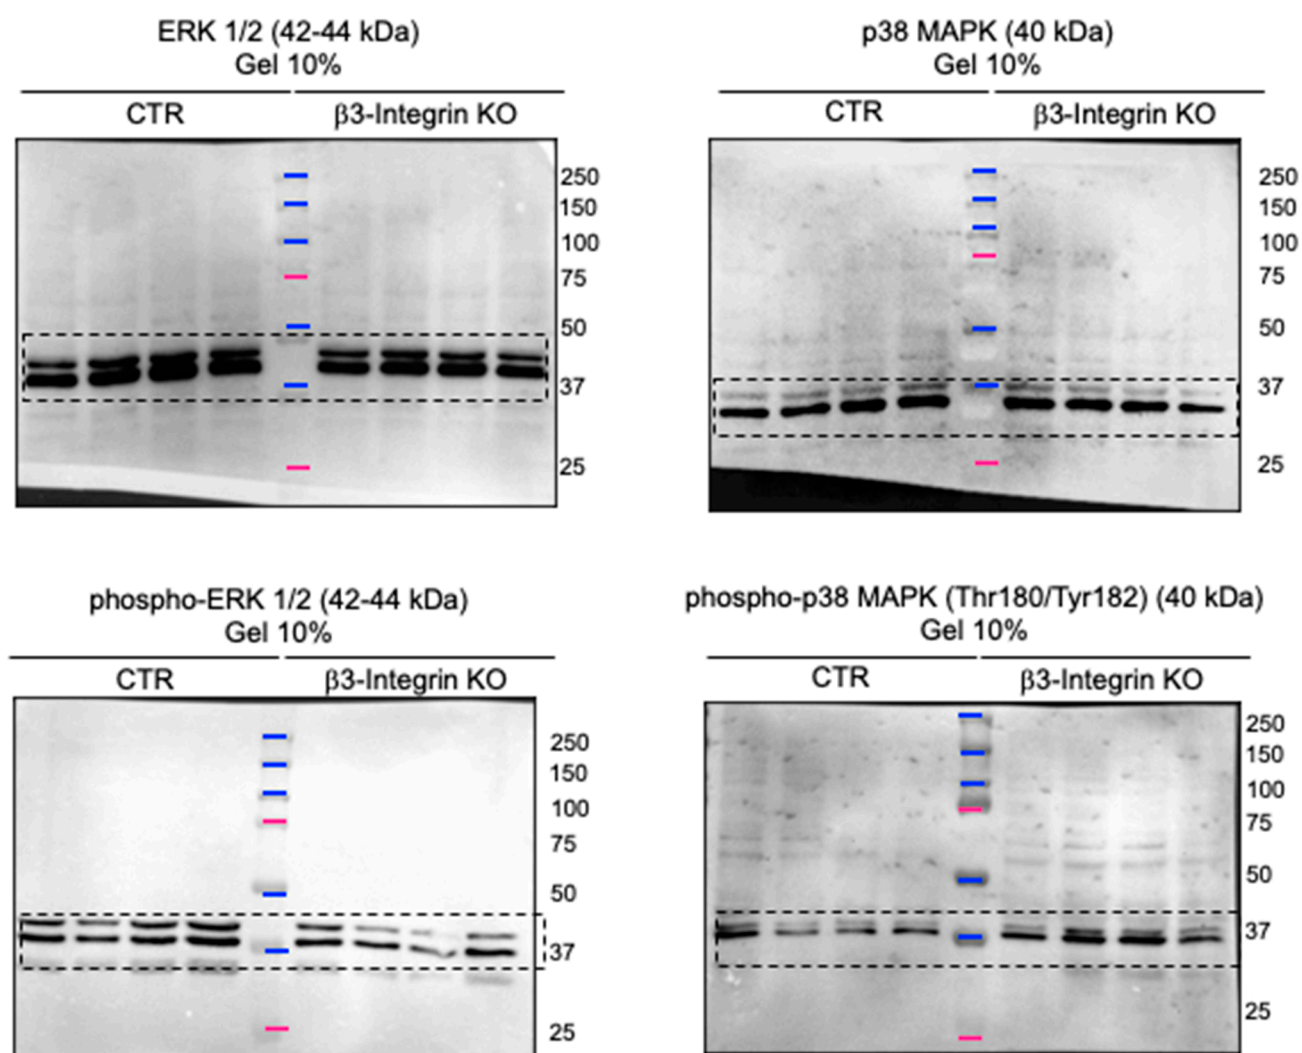

Precision Plus Protein Standards:  
Dual Color BIORAD #161-0374



Figure 3C

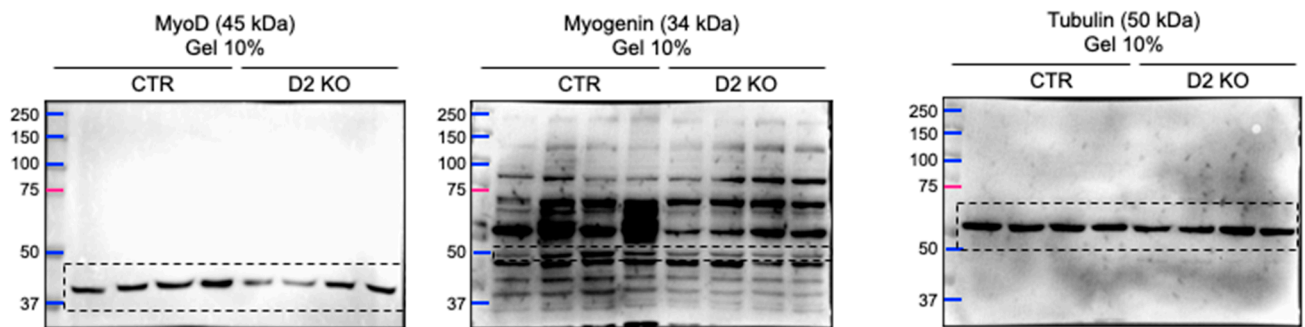

Figure 3I

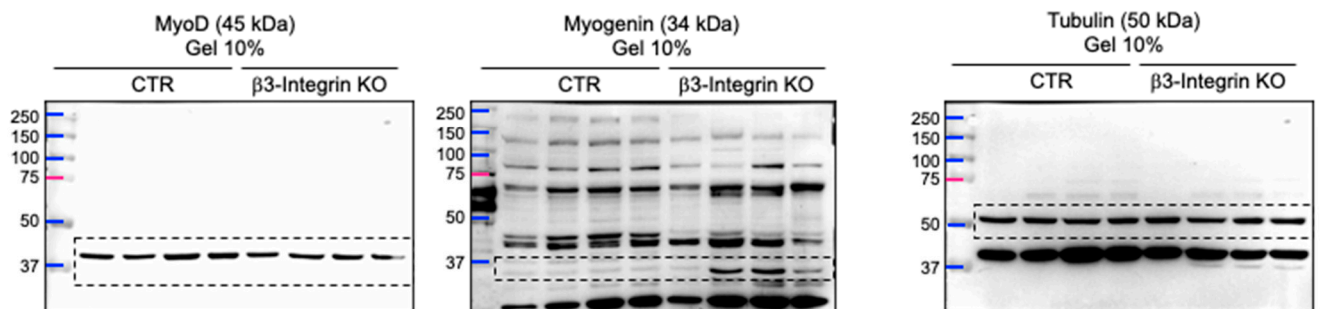

Precision Plus Protein Standards:  
Dual Color BIORAD #161-0374

Figure S2A

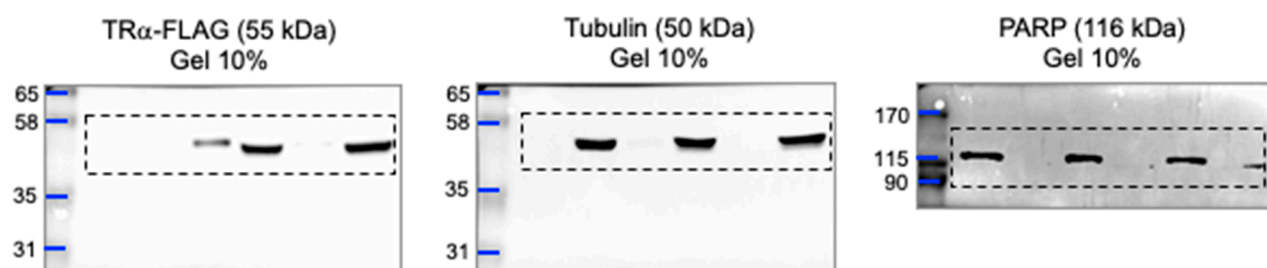

Figure S2B

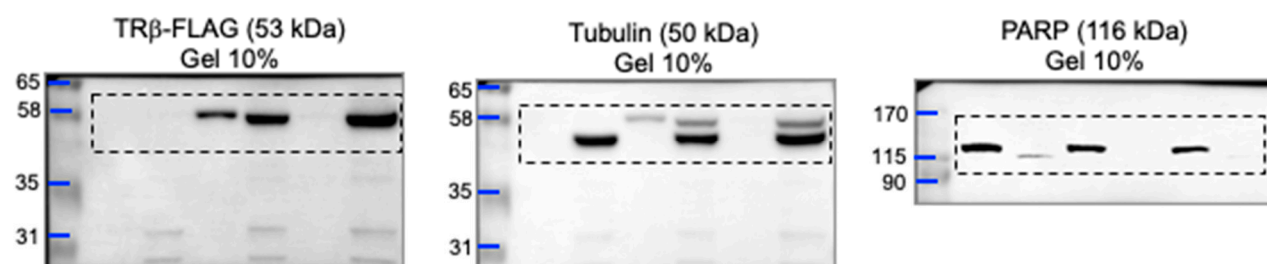

Marker Sigma  
cod. SDS7B2

Figure S4A

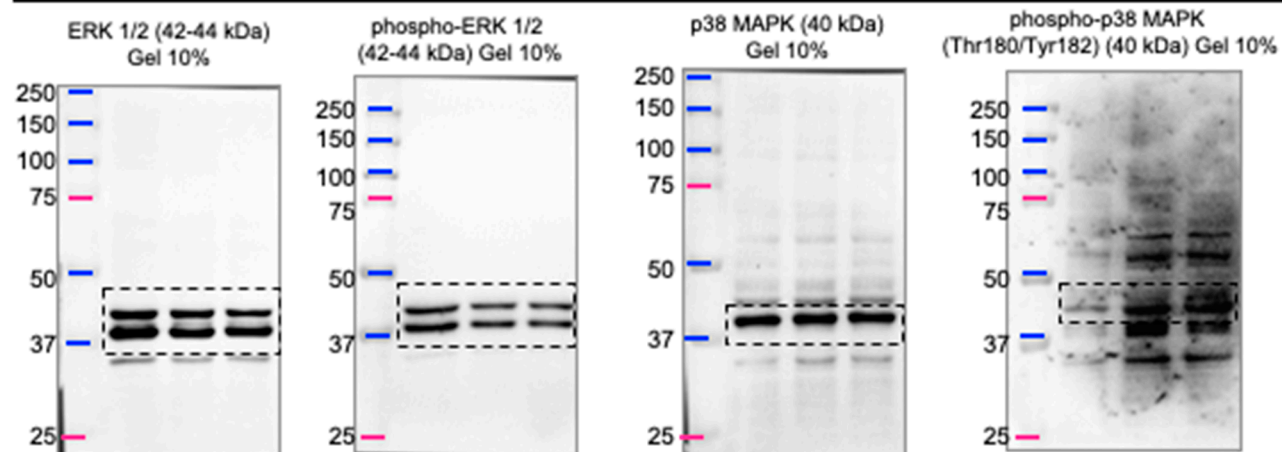

Precision Plus Protein Standards:  
Dual Color BIORAD #161-0374

Figure S5A

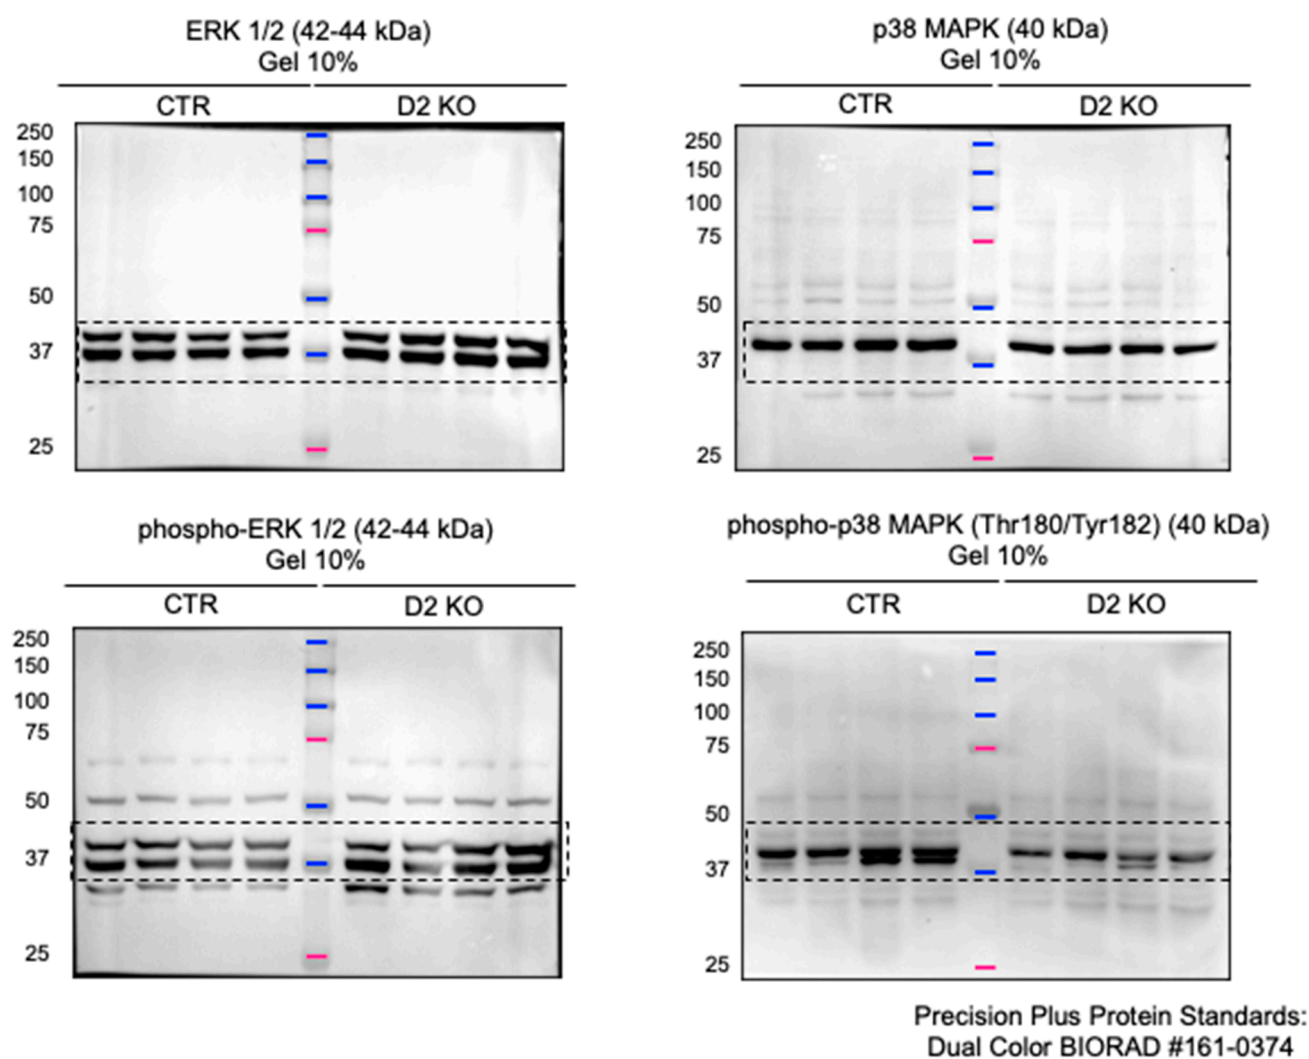

Figure S5B

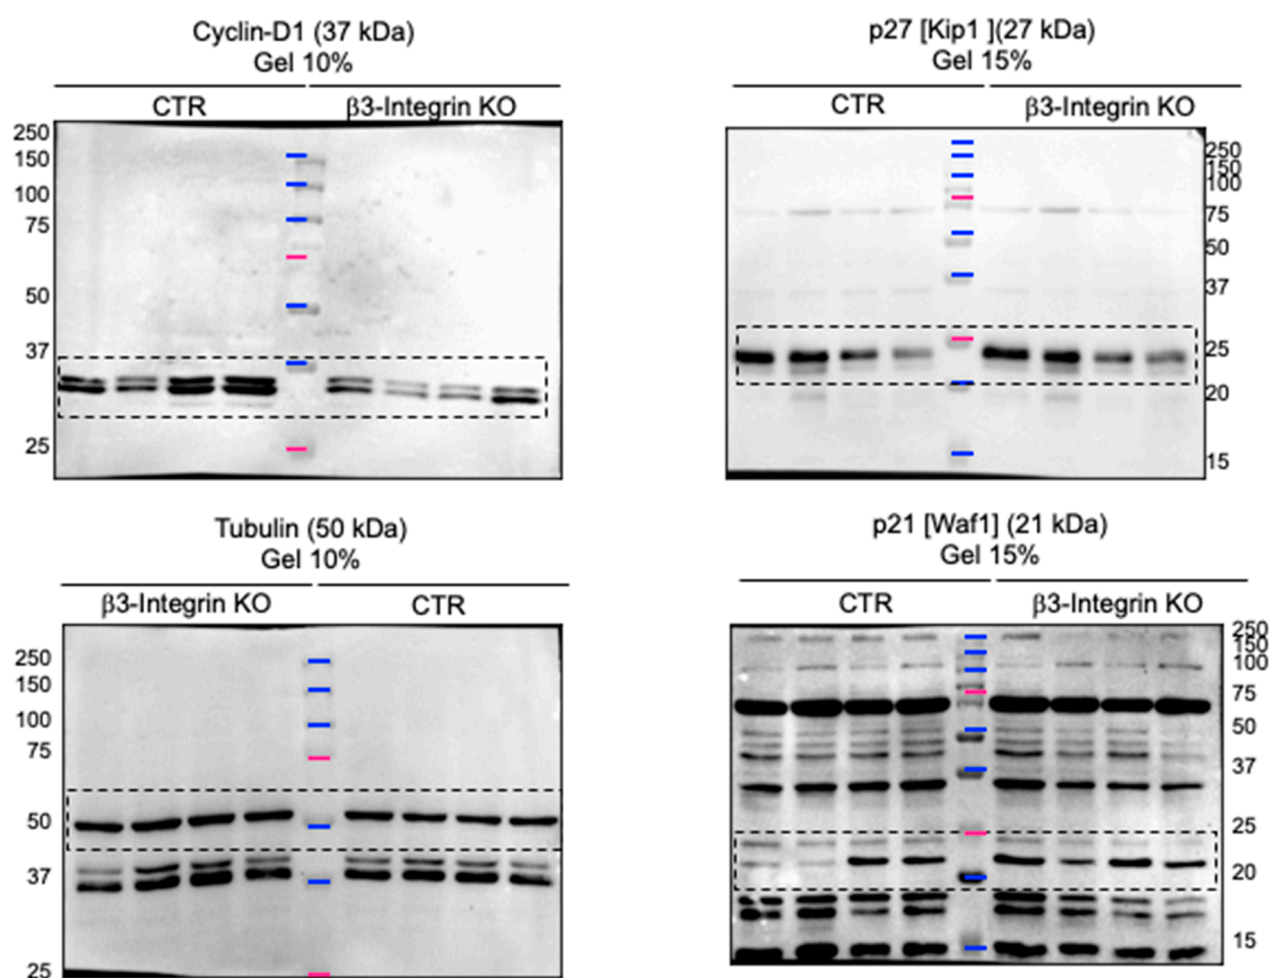

Precision Plus Protein Standards:  
Dual Color BIORAD #161-0374
